# Supplementary material
Source: PubMed Central journal article supplement (PMC7317045)
Supplement: JB.00133-20-s0001.pdf [file JB.00133-20-s0001.pdf]

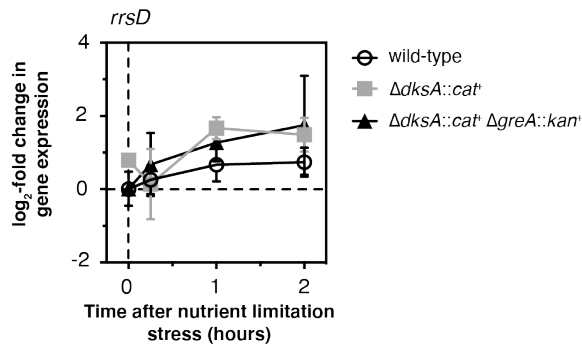

1

2 **FIG S1** 16S rRNA (*rrsD*) expression increases under the nutrient limitation stress

3 conditions used in this paper. *E. coli* MG1655 wild-type and isogenic  $\Delta dksA1000::cat^+$ ,

4 and  $\Delta dksA1000::cat^+ \Delta greA788::kan^+$  strains were grown at 37°C to  $A_{600}=0.2-0.4$  in rich

5 medium (LB) and then shifted to minimal medium (MOPS with no amino acids, 4 g l<sup>-1</sup>

6 glucose, 0.1 mM K<sub>2</sub>HPO<sub>4</sub>, 0.1 mM uracil) for 2 hours. qRT-PCR was used to measure

7 fold changes in transcript abundance, relative to the wild-type at t = 0 h, at the indicated

8 timepoints (n=3, ± SD).

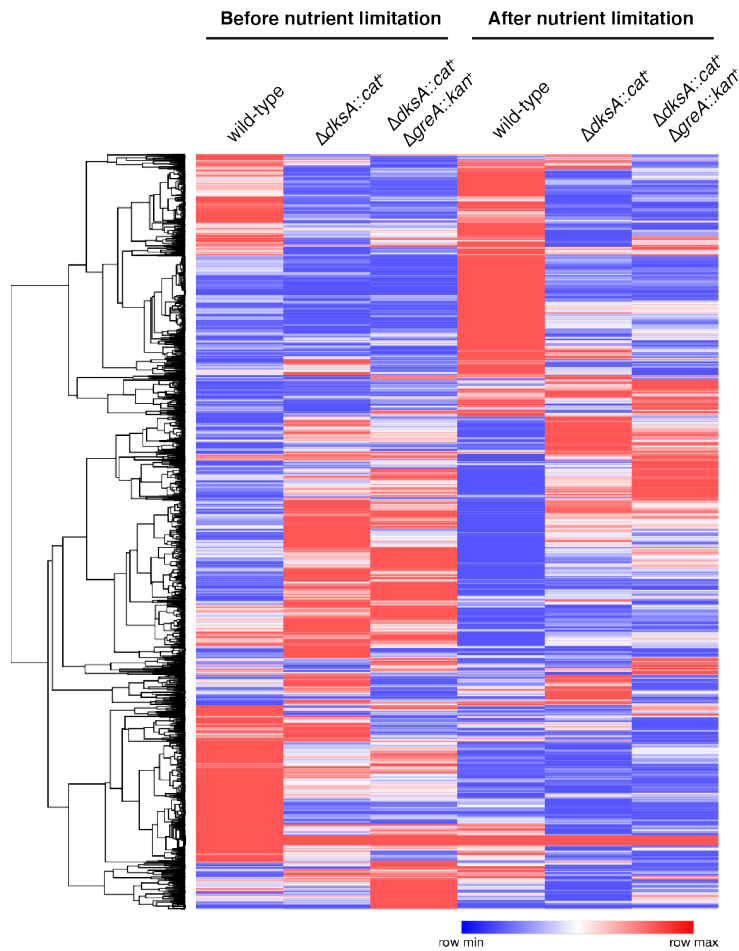

9

10 **FIG S2** Heatmap of RNA sequencing data. *E. coli* strains MG1655, MJG1419  
 11 ( $\Delta dksA1000::cat^+$ ), and MJG1561 ( $\Delta dksA1000::cat^+ \Delta greA788::cat^+$ ) were grown at  
 12 37°C to  $A_{600}=0.2-0.4$  in rich medium (LB)(black circles) and then shifted to minimal  
 13 medium (MOPS with no amino acids, 4 g l<sup>-1</sup> glucose, 0.1 mM K<sub>2</sub>HPO<sub>4</sub>) for 5 minutes (n  
 14 = 1). Heatmap was generated by hierarchical clustering of normalized gene expression  
 15 values (from Supplemental Dataset S1) with Morpheus  
 16 (<https://software.broadinstitute.org/morpheus>), using the default parameters.



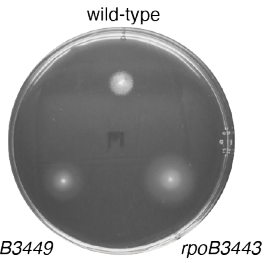

24

*rpoB3449*

*rpoB3443*

25 **FIG S4** Stringent mutations of RNA polymerase lead to enhanced motility. *E. coli*

26 MG1655 wild-type and isogenic *rpoB3449* and *rpoB3443* strains were inoculated into

27 LB containing 0.25% agar and incubated at 37°C (representative of 3 independent

28 experiments).

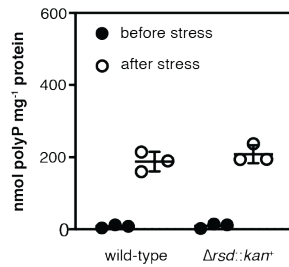

29

30 **FIG S5** An *rsd* null mutation does not affect polyP synthesis. *E. coli* MG1655 wild-type  
 31 and isogenic  $\Delta rsd-766::kan^+$  strains were grown at 37°C to  $A_{600}=0.2-0.4$  in rich medium  
 32 (LB)(black circles) and then shifted to minimal medium (MOPS with no amino acids, 4 g  
 33 l<sup>-1</sup> glucose, 0.1 mM K<sub>2</sub>HPO<sub>4</sub>) for 2 hours (white circles)(n=3, ± SD). PolyP  
 34 concentrations are in terms of individual phosphate monomers. No significant difference  
 35 was found between polyP levels in the mutant and wild-type strains (two-way repeated  
 36 measures ANOVA with Holm-Sidak's multiple comparisons test).

37 **DATASET S1** Results of RNA sequencing of wild-type, *dksA*, and *dksA greA* mutants  
38 before and after nutrient limitation stress. *E. coli* strains MG1655, MJG1419  
39 ( $\Delta dksA1000::cat^+$ ), and MJG1561 ( $\Delta dksA1000::cat^+ \Delta greA788::cat^+$ ) were grown at  
40 37°C to  $A_{600}=0.2-0.4$  in rich medium (LB)(black circles) and then shifted to minimal  
41 medium (MOPS with no amino acids, 4 g l<sup>-1</sup> glucose, 0.1 mM K<sub>2</sub>HPO<sub>4</sub>) for 5 minutes (n  
42 = 1). Gene expression values (RPKM normalized to the upper quartile of gene  
43 expression) were determined using Rockhopper 2 (2), with the default parameters.

44

## 45 REFERENCES

- 46 1. Keseler IM, Mackie A, Santos-Zavaleta A, Billington R, Bonavides-Martinez C,  
47 Caspi R, Fulcher C, Gama-Castro S, Kothari A, Krummenacker M, Latendresse  
48 M, Muniz-Rascado L, Ong Q, Paley S, Peralta-Gil M, Subhraveti P, Velazquez-  
49 Ramirez DA, Weaver D, Collado-Vides J, Paulsen I, Karp PD. 2017. The EcoCyc  
50 database: reflecting new knowledge about Escherichia coli K-12. *Nucleic Acids*  
51 *Res* 45:D543-D550.
- 52 2. Tjaden B. 2015. De novo assembly of bacterial transcriptomes from RNA-seq  
53 data. *Genome Biol* 16:1.

54
